# Supplementary material
Source: PubMed Central journal article supplement (PMC545836)

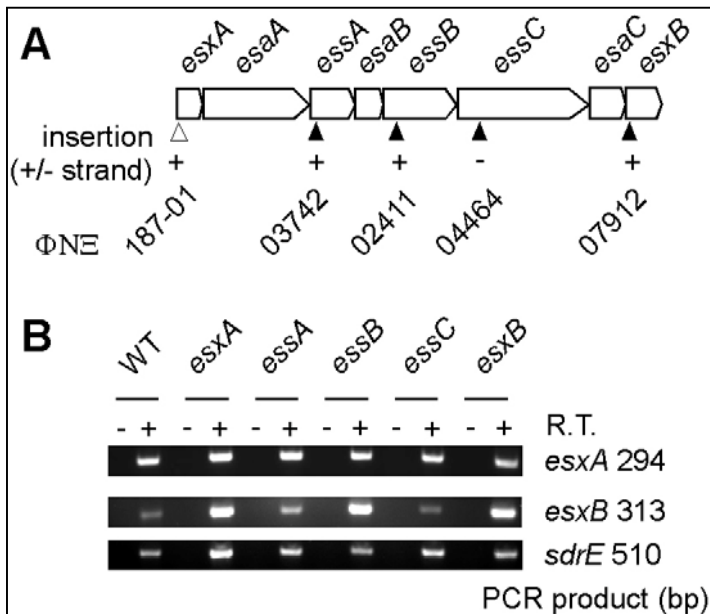

Supplement: pnas_102_4_1169__3.pdf [file pnas_102_4_1169__3.pdf]
